# Supplementary material
Source: ML conference proceedings conference paper supplement (https://proceedings.neurips.cc/paper_files/paper/2014/hash/b139e104214a08ae3f2ebcce149cdf6e-Abstract.html)
Supplement: Supplementary file [file b139e104214a08ae3f2ebcce149cdf6e-Supplemental.zip]

## A Proofs

### A.1 Proof of Theorem 1

*Proof of Lemma 1.* Denote the solution to problem (4) by  $B^*(D)$ . Suppose that  $M_n$  is an  $(n, B)$ -rate estimation code  $M_n$  with risk  $\mathbb{E} d(\theta^n, M_n(X^n)) \leq D$ . We have

$$B \geq I(X^n; M_n(X^n))/n \quad (7)$$

$$\geq B^*(\mathbb{E} d(\theta^n, M_n(X^n))) \quad (8)$$

$$\geq B^*(D), \quad (9)$$

where (7) follows from the fact that  $M_n(X^n)$  takes at most  $2^{nB}$  values; (8) follows from the definition of  $B^*(\cdot)$ ; (9) follows from the monotonicity of  $B^*(\cdot)$  and the fact that  $\mathbb{E} d(\theta^n, M_n(X^n)) \leq D$ .  $\square$

*Proof of Lemma 2.* Suppose that  $\tilde{\theta}^n$  satisfies the conditions in problem (4). Write  $\gamma = c^2/(\sigma^2 + c^2)$ . For  $i = 1, 2, \dots, n$ , consider the decomposition

$$\begin{aligned} \mathbb{E}(\theta_i - \tilde{\theta}_i)^2 &= \mathbb{E}(\theta_i - \gamma X_i + \gamma X_i - \tilde{\theta}_i)^2 \\ &= \mathbb{E}(\theta_i - \gamma X_i)^2 + \mathbb{E}(\tilde{\theta}_i - \gamma X_i)^2 - 2\mathbb{E}\left((\theta_i - \gamma X_i)(\tilde{\theta}_i - \gamma X_i)\right) \\ &= \frac{\sigma^2 c^2}{\sigma^2 + c^2} + \mathbb{E}(\tilde{\theta}_i - \gamma X_i)^2. \end{aligned}$$

The last equality follows from

$$\mathbb{E}\left((\tilde{\theta}_i - \gamma X_i)(\theta_i - \gamma X_i)\right) = \mathbb{E}\left(\mathbb{E}(\theta_i - \gamma X_i | X_i) \mathbb{E}(\tilde{\theta}_i - \gamma X_i | X_i)\right) = 0,$$

where we have used the fact that  $\theta_i \rightarrow X_i \rightarrow \tilde{\theta}_i$  is a Markov chain and that  $\mathbb{E}(\theta_i | X_i) = \gamma X_i$ . Summing over  $i = 1, \dots, n$ , we have

$$\mathbb{E} d(\theta^n, \tilde{\theta}^n) = \frac{\sigma^2 c^2}{\sigma^2 + c^2} + \mathbb{E} d(\tilde{\theta}^n, \gamma X^n).$$

A lower bound on the mutual information can be obtained as

$$\begin{aligned} \frac{1}{n} I(X^n; \tilde{\theta}^n) &= \frac{1}{n} I(\gamma X^n; \tilde{\theta}^n) \geq \frac{1}{n} \sum_{i=1}^n I(\gamma X_i; \tilde{\theta}_i) \\ &= \frac{1}{n} \sum_{i=1}^n \left( h(\gamma X_i) - h(\gamma X_i | \tilde{\theta}_i) \right) \\ &= \frac{1}{n} \sum_{i=1}^n \left( h(\gamma X_i) - h(\gamma X_i - \tilde{\theta}_i | \tilde{\theta}_i) \right) \\ &\geq \frac{1}{n} \sum_{i=1}^n \left( h(\gamma X_i) - h(\gamma X_i - \tilde{\theta}_i) \right) \\ &\geq \frac{1}{n} \sum_{i=1}^n \left( h(\gamma X_i) - h\left(\mathcal{N}(0, \mathbb{E}(\gamma X_i - \tilde{\theta}_i)^2)\right) \right) \quad (10) \end{aligned}$$

$$\begin{aligned} &= \frac{1}{n} \sum_{i=1}^n \left( \frac{1}{2} \log \frac{c^4}{\sigma^2 + c^2} - \frac{1}{2} \log \mathbb{E}(\gamma X_i - \tilde{\theta}_i)^2 \right) \\ &= \frac{1}{2} \log \frac{c^4}{\sigma^2 + c^2} - \frac{1}{n} \sum_{i=1}^n \frac{1}{2} \log \mathbb{E}(\gamma X_i - \tilde{\theta}_i)^2 \\ &\geq \frac{1}{2} \log \frac{c^4}{\sigma^2 + c^2} - \frac{1}{2} \log \mathbb{E} d(\tilde{\theta}^n, \gamma X^n) \quad (11) \\ &= \frac{1}{2} \log \frac{\frac{c^4}{\sigma^2 + c^2}}{\mathbb{E} d(\theta^n, \tilde{\theta}^n) - \frac{\sigma^2 c^2}{\sigma^2 + c^2}} \end{aligned}$$

where (10) follows from the fact that the normal distribution maximizes the entropy for a given second moment, (11) follows from the concavity of the log function, and the other inequalities follow from the properties of mutual information and entropy. Since  $\mathbb{E} d(\theta^n, \tilde{\theta}^n) \leq D$ , we have

$$\frac{1}{n} I(X^n; \tilde{\theta}^n) \geq \frac{1}{2} \log \frac{\frac{c^4}{\sigma^2 + c^2}}{D - \frac{\sigma^2 c^2}{\sigma^2 + c^2}}.$$

On the other hand, a calculation shows that the following joint distribution

$$\tilde{\theta}^n \sim \mathcal{N}(0, \gamma^2(\sigma^2 + c^2 - D)I_n), \quad X^n \sim \mathcal{N}(\tilde{\theta}^n/\gamma, DI_n), \quad \theta^n \sim \mathcal{N}(\gamma X^n, \gamma\sigma^2 I_n). \quad (12)$$

achieves the lower bound, which concludes the proof.  $\square$

*Proof of Theorem 1.* Suppose that  $M_n$  is an  $(n, B)$ -rate estimation code. Let  $\pi_n$ , the prior on  $\theta^n$ , be  $\mathcal{N}(0, c^2 I_n)$ . According to Lemmas 1 and 2

$$\begin{aligned} \frac{\sigma^2 c^2}{\sigma^2 + c^2} + \frac{c^4}{\sigma^2 + c^2} 2^{-2B} &= \int \mathbb{E}_{X^n} d(\theta^n, \tilde{\theta}^n) d\pi_n(\theta^n) \\ &\leq \int \mathbb{E}_{X^n} d(\theta^n, M_n(X^n)) d\pi_n(\theta^n), \end{aligned}$$

where  $\tilde{\theta}^n$  follows the distribution specified in (12). It then suffices to show that as  $n \rightarrow \infty$

$$\int \mathbb{E}_{X^n} d(\theta^n, M_n(X^n)) d\pi_n(\theta^n) \leq \sup_{\theta^n \in \Theta_n(c)} \mathbb{E}_{X^n} d(\theta^n, M_n(X^n)).$$

In fact, if the above inequality holds, taking a supremum over  $M_n \in \mathcal{M}_{n,B}$  gives the desired lower bound. Recall that  $\Theta_n(c) = \{\theta^n : \frac{1}{n} \sum_{i=1}^n \theta_i^2 \leq c^2\}$ . Paralleling the argument in [9, 13], we have

$$\begin{aligned} &\int \mathbb{E}_{X^n} d(\theta^n, M_n(X^n)) d\pi_n(\theta^n) \\ &= \int_{\Theta_n(c)} \mathbb{E}_{X^n} d(\theta^n, M_n(X^n)) d\pi_n(\theta^n) + \int_{\overline{\Theta_n(c)}} \mathbb{E}_{X^n} d(\theta^n, M_n(X^n)) d\pi_n(\theta^n) \\ &\leq \sup_{\Theta_n(c)} \mathbb{E}_{X^n} d(\theta^n, M_n(X^n)) + \int_{\overline{\Theta_n(c)}} \mathbb{E}_{X^n} d(\theta^n, M_n(X^n)) d\pi_n(\theta^n). \end{aligned}$$

It remains to show that

$$\int_{\overline{\Theta_n(c)}} \mathbb{E}_{X^n} d(\theta^n, M_n(X^n)) d\pi_n(\theta^n) \rightarrow 0.$$

where  $\overline{\Theta_n(c)}$  denotes the complement of  $\Theta_n(c)$ . For a fixed  $\delta \in (0, 1)$ , let  $\pi_{n,\delta}$  be a  $\mathcal{N}(0, c^2 \delta^2 I_n)$  prior on  $\theta^n$ . Replacing  $\pi_n$  by  $\pi_{n,\delta}$ , and using the Cauchy-Schwarz inequality, we get

$$\begin{aligned} &\int_{\overline{\Theta_n(c)}} \mathbb{E}_{X^n} d(\theta^n, M_n(X^n)) d\pi_{n,\delta}(\theta^n) \\ &\leq 2 \int_{\overline{\Theta_n(c)}} \frac{1}{n} \|\theta^n\|^2 d\pi_{n,\delta}(\theta^n) + 2 \int_{\overline{\Theta_n(c)}} \mathbb{E}_{X^n} \frac{1}{n} \|M(X^n)\|^2 d\pi_{n,\delta}(\theta^n) \\ &\leq \frac{2}{n} \sqrt{\pi_{n,\delta}(\overline{\Theta_n(c)})} \sqrt{\mathbb{E}_{\pi_{n,\delta}} \|\theta^n\|^4} + 2c^2 \pi_{n,\delta}(\overline{\Theta_n(c)}). \end{aligned} \quad (13)$$

Now we bound the two terms in the formula above. First,

$$\begin{aligned} \pi_{n,\delta}(\overline{\Theta_n(c)}) &= \mathbb{P}\left(\frac{1}{n} \sum_{i=1}^n \theta_i^2 > c^2\right) \\ &= \mathbb{P}\left(\frac{1}{n} \sum_{i=1}^n \left(\left(\frac{\theta_i}{\delta c}\right)^2 - 1\right) > \frac{1 - \delta^2}{\delta^2}\right) \\ &\leq 2 \exp\left(-\frac{n(1 - \delta^2)^2}{8\delta^4}\right) \end{aligned}$$

where the last inequality is due to the following large deviation inequality: if  $Z_1, \dots, Z_n \sim \mathcal{N}(0, 1)$  and  $0 < t < 1$ , then

$$\mathbb{P} \left( \left| \frac{1}{n} \sum_{i=1}^n (Z_i^2 - 1) \right| > t \right) \leq 2e^{-nt^2/8}.$$

Next, we note that

$$\begin{aligned} \mathbb{E}_{\pi_{n,\delta}} \|\theta^n\|^4 &= \sum_{i=1}^n \mathbb{E}_{\pi_{n,\delta}} \theta_i^4 + \sum_{i \neq j} \mathbb{E}_{\pi_{n,\delta}} \theta_i^2 \cdot \mathbb{E}_{\pi_{n,\delta}} \theta_j^2 \\ &= n \mathbb{E}_{\pi_{n,\delta}} \theta_1^4 + \binom{n}{2} c^2 \delta^2 \\ &= O(n^2). \end{aligned}$$

Therefore, we have from (13)

$$\begin{aligned} &\int_{\Theta_n(c)} \mathbb{E}_{X^n} d(\theta^n, M_n(X^n)) d\pi_{n,\delta}(\theta^n) \\ &\leq \frac{2}{n} \cdot \sqrt{2} \exp \left( -\frac{n(1-\delta^2)^2}{16\delta^4} \right) O(n) + 2c^2 \exp \left( -\frac{n(1-\delta^2)^2}{8\delta^4} \right) \rightarrow 0 \end{aligned}$$

for any  $\delta \in (0, 1)$ . The conclusion then follows by letting  $\delta \uparrow 1$ .  $\square$

## A.2 Proof of Theorem 2

*Proof of Theorem 2.* Suppose that  $\|\theta^n\|/n = b^2 \leq c^2$  and that  $X_i \sim \mathcal{N}(\theta_i, \sigma^2)$ . Writing  $\hat{b}^2 = \|X^n\|^2/n - \sigma^2$  and  $\hat{\gamma} = \frac{\hat{b}^2}{\sigma^2 + \hat{b}^2}$ , we have the decomposition of the loss

$$\begin{aligned} d(\theta^n, \check{\theta}^n) &= \frac{1}{n} \|\check{\theta}^n - \theta^n\|^2 \\ &= \frac{1}{n} \|\check{\theta}^n - \hat{\gamma} X^n + \hat{\gamma} X^n - \theta^n\|^2 \\ &= \underbrace{\frac{1}{n} \|\check{\theta}^n - \hat{\gamma} X^n\|^2}_{A_1} + \underbrace{\frac{1}{n} \|\hat{\gamma} X^n - \theta^n\|^2}_{A_2} + \underbrace{\frac{2}{n} \langle \check{\theta}^n - \hat{\gamma} X^n, \hat{\gamma} X^n - \theta^n \rangle}_{A_3}. \end{aligned}$$

(i) Term  $A_1$  characterizes the quantization error. It has the following decomposition

$$A_1 = \frac{1}{n} \|\check{\theta}^n\|^2 + \frac{1}{n} \hat{\gamma}^2 \|X^n\|^2 - \frac{2}{n} \langle \check{\theta}^n, \hat{\gamma} X^n \rangle.$$

By Lemma 3 and Lemma 5 below, we have

$$\frac{1}{n} \|X^n\|^2 - b^2 - \sigma^2 = O_P \left( \frac{1}{\sqrt{n}} \right), \quad \frac{\langle X^n, \check{X}^n \rangle}{\|X\|} - \sqrt{1 - 2^{-2B}} = O_P \left( \frac{\log n}{n} \right),$$

and therefore

$$\begin{aligned} \frac{1}{n} \|\check{\theta}^n\|^2 &= \frac{\check{b}^4(1 - 2^{-2B})}{\sigma^2 + \check{b}^2} = \frac{b^4}{\sigma^2 + b^2} (1 - 2^{-2B}) + O_P \left( \frac{1}{\sqrt{n}} \right), \\ \frac{1}{n} \hat{\gamma}^2 \|X^n\|^2 &= \frac{\hat{b}^4}{\sigma^2 + \hat{b}^2} = \frac{b^4}{\sigma^2 + b^2} + O_P \left( \frac{1}{\sqrt{n}} \right), \\ \frac{2}{n} \langle \check{\theta}^n, \hat{\gamma} X^n \rangle &= \frac{2}{n} \frac{\hat{b}^2}{\sigma^2 + \hat{b}^2} \sqrt{\frac{n \check{b}^4(1 - 2^{-2B})}{\sigma^2 + \check{b}^2}} \cdot \langle X^n, \check{X}^n \rangle \\ &= \frac{2 \hat{b}^2 \check{b}^2 \sqrt{1 - 2^{-2B}}}{\sqrt{(\sigma^2 + \hat{b}^2)(\sigma^2 + \check{b}^2)}} \frac{\langle X, \check{X} \rangle}{\|X\|} \end{aligned}$$

$$= \frac{2b^4}{\sigma^2 + b^2}(1 - 2^{-2B}) + O_P\left(\frac{1}{\sqrt{n}}\right).$$

which, combined together, gives us

$$\begin{aligned} A_1 &= \frac{b^4}{\sigma^2 + b^2}(1 - 2^{-2B}) + \frac{b^4}{\sigma^2 + b^2} - \frac{2b^4}{\sigma^2 + b^2}(1 - 2^{-2B}) + O_P\left(\frac{1}{\sqrt{n}}\right) \\ &= \frac{b^4}{\sigma^2 + b^2}2^{-2B} + O_P\left(\frac{1}{\sqrt{n}}\right). \end{aligned}$$

- (ii) Term  $A_2$  does not involve random codebook, and is essentially the average loss of a James-Stein-type estimator. Suppose that  $A_n$  is an  $n \times n$  orthonormal matrix such that  $A_n \theta^n = (\sqrt{n}b, 0, \dots, 0)^T$ , which we will denote by  $\tau^n$ . Let  $Y^n = A_n X^n$ . Then  $Y^n \sim \mathcal{N}(\tau^n, \sigma^2 I)$  and  $\|X^n\| = \|Y^n\|$ . Expressing  $A_2$  in terms of  $Y^n$ , we have

$$\begin{aligned} A_2 &= \frac{1}{n} \|\hat{\gamma} X^n - \theta^n\|^2 \\ &= \frac{1}{n} \|\hat{\gamma} A_n X^n - A_n \theta^n\|^2 \\ &= \frac{1}{n} \|\hat{\gamma} Y^n - \tau^n\|^2 \\ &= \frac{1}{n} \hat{\gamma}^2 \|Y^n\|^2 - 2\hat{\gamma} b \frac{Y_1}{\sqrt{n}} + b^2 \\ &= \frac{b^2 \sigma^2}{\sigma^2 + b^2} + O_P\left(\frac{1}{\sqrt{n}}\right). \end{aligned}$$

The last equality is because

$$\frac{1}{n} \|Y^n\|^2 - b^2 - \sigma^2 = O_P\left(\frac{1}{\sqrt{n}}\right), \quad \frac{Y_1}{\sqrt{n}} - b = O_P\left(\frac{1}{\sqrt{n}}\right).$$

- (iii) Finally, it can be shown that the cross term satisfies  $A_3 = O_P(\sqrt{\frac{\log n}{n}})$  by exploiting the geometry of the vectors, and using the fact that most vectors are nearly orthogonal to each other in a high dimensional space. In fact, write

$$\hat{\theta}^n = \sqrt{\frac{n\hat{b}^4(1 - 2^{-2B})}{\hat{b}^2 + \sigma^2}} \cdot \check{X}^n.$$

Then in the decomposition

$$\frac{2}{n} \langle \check{\theta}^n - \hat{\gamma} X^n, \hat{\gamma} X^n - \theta^n \rangle = \frac{2}{n} \langle \check{\theta}^n - \hat{\theta}^n, \hat{\gamma} X^n - \theta^n \rangle + \frac{2}{n} \langle \hat{\theta}^n, \hat{\gamma} X^n - \theta^n \rangle - \frac{2}{n} \langle \hat{\gamma} X^n, \hat{\gamma} X^n - \theta^n \rangle,$$

the first term is  $O_P(\frac{1}{\sqrt{n}})$ , since  $\frac{1}{\sqrt{n}} \|\check{\theta}^n - \hat{\theta}^n\| = O_P(\frac{1}{\sqrt{n}})$  and  $\frac{1}{\sqrt{n}} \|\hat{\gamma} X^n - \theta^n\|$  has bounded second moment, and the third term is

$$\begin{aligned} \frac{2}{n} \langle \hat{\gamma} X^n, \hat{\gamma} X^n - \theta^n \rangle &= \frac{2}{n} \langle \hat{\gamma} Y^n, \hat{\gamma} Y^n - \tau^n \rangle \\ &= \frac{2}{n} \hat{\gamma}^2 \|Y^n\|^2 - 2\hat{\gamma} b \frac{Y_1}{\sqrt{n}} = O_P\left(\frac{1}{\sqrt{n}}\right). \end{aligned}$$

Now consider the second term

$$\frac{2}{n} \langle \hat{\theta}^n, \hat{\gamma} X^n - \theta^n \rangle = \frac{2}{n} \langle \hat{\theta}^n, \tilde{\gamma} X^n - \theta^n \rangle + \frac{2}{n} (\hat{\gamma} - \tilde{\gamma}) \langle \hat{\theta}^n, X^n \rangle$$

where

$$\tilde{\gamma} \triangleq \frac{\sum_{i=1}^n \theta_i X_i}{\|X^n\|^2}, \quad \text{satisfying } \frac{2}{n} (\hat{\gamma} - \tilde{\gamma}) \langle \hat{\theta}^n, X^n \rangle = O_P\left(\frac{1}{\sqrt{n}}\right) \text{ and } \langle X^n, \tilde{\gamma} X^n - \theta^n \rangle = 0.$$

Thus, we are left with one last term to analyze:

$$\begin{aligned} \frac{2}{n} \langle \hat{\theta}^n, \tilde{\gamma} X^n - \theta^n \rangle &= \frac{2}{n} \sqrt{\frac{n \hat{b}^4 (1 - 2^{-2B})}{\hat{b}^2 + \sigma^2}} \langle \check{X}^n, \tilde{\gamma} X^n - \theta^n \rangle \\ &= \sqrt{\frac{4 \hat{b}^4 (1 - 2^{-2B})}{\hat{b}^2 + \sigma^2}} \langle \check{X}^n, \frac{1}{\sqrt{n}} (\tilde{\gamma} X^n - \theta^n) \rangle \end{aligned}$$

The scaling factor in front of the inner product is some constant plus an  $O_P(\frac{1}{\sqrt{n}})$  term, so we consider the inner product. Notice that the projection of  $\check{X}^n$  onto the orthogonal space of  $X^n$ ,  $\text{Proj}_{X^n \perp}(\check{X}^n)$ , is independent of  $X^n$ . Furthermore, by symmetry,  $\text{Proj}_{X^n \perp}(\check{X}^n)$  has a spherical distribution in  $\mathbb{R}^{n-1}$ , and has a length  $\sqrt{1 - 2^{-2B}} + O_P(\frac{\log n}{n})$ . That is, we can write

$$\text{Proj}_{X^n \perp}(\check{X}^n) = L_n \cdot U^n$$

where  $U^n$  follows the uniform distribution on sphere  $\mathbb{S}^{n-1}$  and  $L_n = \sqrt{1 - 2^{-2B}} + O_P(\frac{\log n}{n})$ . Conditioning on  $X^n$ , since  $\langle X^n, \tilde{\gamma} X^n - \theta^n \rangle = 0$ , we have

$$\begin{aligned} &\mathbb{P} \left( \langle \check{X}^n, \frac{1}{\sqrt{n}} (\tilde{\gamma} X^n - \theta^n) \rangle > t \mid X^n = x^n \right) \\ &= \mathbb{P} \left( \langle \text{Proj}_{X^n \perp}(\check{X}^n), \text{Proj}_{X^n \perp}(\frac{1}{\sqrt{n}} (\tilde{\gamma} X^n - \theta^n)) \rangle > t \mid X^n = x^n \right) \\ &= \mathbb{P} \left( L_n \left\| \frac{1}{\sqrt{n}} (\tilde{\gamma} x^n - \theta^n) \right\| \langle U^n, e^n \rangle > t \right) \\ &\leq K_1 \sqrt{n} \left( 1 - \frac{t^2}{K_2 \left\| \frac{1}{\sqrt{n}} (\tilde{\gamma} x^n - \theta^n) \right\|^2} \right)^{\frac{n-2}{2}}. \end{aligned}$$

where  $K_1$  and  $K_2$  are positive constants, and the last inequality follows from Lemma 6 below. It then follows that

$$\begin{aligned} &\mathbb{P} \left( \langle \check{X}^n, \frac{1}{\sqrt{n}} (\tilde{\gamma} X^n - \theta^n) \rangle > t \right) \\ &= \int \mathbb{P} \left( \langle \check{X}^n, \frac{1}{\sqrt{n}} (\tilde{\gamma} X^n - \theta^n) \rangle > t \mid X^n = x^n \right) p_{X^n}(x^n) dx^n \\ &\leq K_1 \sqrt{n} \int \left( 1 - \frac{t^2}{K_2 \left\| \frac{1}{\sqrt{n}} (\tilde{\gamma} x^n - \theta^n) \right\|^2} \right)^{\frac{n-2}{2}} p_{X^n}(x^n) dx^n \\ &\leq K_1 \sqrt{n} \left( 1 - \frac{t^2}{K_2'} \right)^{\frac{n-2}{2}} + \mathbb{P} \left( \frac{1}{n} \|X^n\|^2 > b^2 + \sigma^2 + K_3 \right). \end{aligned}$$

for positive constants  $K_1, K_2$  and  $K_3$ . This implies that  $\langle \check{X}^n, \frac{1}{\sqrt{n}} (\tilde{\gamma} X^n - \theta^n) \rangle = O_P(\sqrt{\frac{\log n}{n}})$  and thus  $A_3 = O_P(\sqrt{\frac{\log n}{n}})$ .

Combining the above analyses for  $A_1, A_2$  and  $A_3$  together gives us the theorem.  $\square$

**Lemma 3.** Suppose that  $X_i \stackrel{\text{ind.}}{\sim} N(\theta_i, \sigma^2)$ , for  $i = 1, \dots, n$  and that  $\frac{1}{n} \sum_{i=1}^n \theta_i^2 = b^2$ . Then

$$\mathbb{P} \left( \left| \frac{1}{n} \sum_{i=1}^n X_i^2 - b^2 - \sigma^2 \right| \geq t \right) \leq 2 \exp \left( -\frac{nt^2}{32\sigma^4} \right) + \frac{8\sigma b}{\sqrt{2\pi n} t^2} \exp \left( -\frac{nt^2}{32\sigma^2 b^2} \right).$$

Specifically, if we write  $\hat{b}^2 = \|X\|^2/n - \sigma^2$ , we have  $\hat{b}^2 - b^2 = O_P(\frac{1}{\sqrt{n}})$ .

*Proof.* Writing  $X_i = \theta_i + \epsilon_i$ , we have

$$\begin{aligned}
& \mathbb{P} \left( \left| \frac{1}{n} \sum_{i=1}^n X_i^2 - b^2 - \sigma^2 \right| > t \right) \\
&= \mathbb{P} \left( \left| \frac{1}{n} \sum_{i=1}^n (\epsilon_i^2 - \sigma^2) + \frac{2}{n} \sum_{i=1}^n \theta_i \epsilon_i \right| > t \right) \\
&\leq \mathbb{P} \left( \left| \frac{1}{n} \sum_{i=1}^n (\epsilon_i^2 - \sigma^2) \right| > \frac{t}{2} \right) + \mathbb{P} \left( \left| \frac{2}{n} \sum_{i=1}^n \theta_i \epsilon_i \right| > \frac{t}{2} \right) \\
&\leq \mathbb{P} \left( \left| \frac{1}{n} \sum_{i=1}^n \left( \left( \frac{\epsilon_i}{\sigma} \right)^2 - 1 \right) \right| > \frac{t}{2\sigma^2} \right) + \mathbb{P} \left( \left| \frac{2}{n} \mathcal{N}(0, n\sigma^2 b^2) \right| > \frac{t}{2} \right) \\
&\leq 2 \exp \left( -\frac{nt^2}{32\sigma^4} \right) + \frac{8\sigma b}{\sqrt{2\pi}nt^2} \exp \left( -\frac{nt^2}{32\sigma^2 b^2} \right)
\end{aligned}$$

where the last inequality follows from the previously mentioned large deviation inequality and the upper tail inequality for the normal distribution.  $\square$

**Lemma 4** (Lemma 4.1 from [2]). *Suppose that  $Y$  is uniformly distributed on the  $n$ -dimensional unit sphere  $\mathbb{S}^{n-1}$ . For  $x \in \mathbb{R}^n$  such that  $\|x\|_2 = 1$ , the inner product  $\rho = \langle x, Y \rangle$  between  $x$  and  $Y$  has density function*

$$f(\rho) = \frac{1}{\sqrt{\pi}} \frac{\Gamma(\frac{n}{2})}{\Gamma(\frac{n-1}{2})} (1 - \rho^2)^{\frac{n-3}{2}} I(|\rho| < 1).$$

**Lemma 5.** *Suppose that  $p = e^{n\beta}$  and  $Y_1, \dots, Y_p$  are independent and identically distributed with a uniform distribution on the  $n$ -dimensional sphere  $\mathbb{S}^{n-1}$ . For a fixed unit vector  $x \in \mathbb{R}^n$ , let  $\rho_i = \langle x, Y_i \rangle$  and  $L_n = \max_{1 \leq i \leq p} \rho_i$ . Then  $L_n \rightarrow \sqrt{1 - e^{-2\beta}}$  in probability as  $n \rightarrow \infty$ . Furthermore,  $L_n - \sqrt{1 - e^{-2\beta}} = O_P(\frac{\log n}{n})$ .*

*Proof.* Let  $k_n = \frac{n}{\log n}$ . For any fixed  $u \in \mathbb{R}$

$$\begin{aligned}
& \mathbb{P} \left( k_n \left( L_n - \sqrt{1 - e^{-2\beta}} \right) \leq u \right) \\
&= \mathbb{P} \left( L_n \leq \frac{u}{k_n} + \sqrt{1 - e^{-2\beta}} \right) \\
&= \mathbb{P} \left( \rho_1 \leq \frac{u}{k_n} + \sqrt{1 - e^{-2\beta}} \right)^p \\
&= \left( 1 - \int_{u/k_n + \sqrt{1 - e^{-2\beta}}}^1 \frac{1}{\sqrt{\pi}} \frac{\Gamma(\frac{n}{2})}{\Gamma(\frac{n-1}{2})} (1 - \rho^2)^{\frac{n-3}{2}} d\rho \right)^p \\
&\sim \left( 1 - \frac{\sqrt{n}}{\sqrt{2\pi}(n-3)(\frac{u}{k_n} + \sqrt{1 - e^{-2\beta}})} \left( 1 - \left( \frac{u}{k_n} + \sqrt{1 - e^{-2\beta}} \right)^2 \right)^{\frac{n-1}{2}} \right)^p \\
&\sim \exp \left( -p \cdot \frac{\sqrt{n}}{\sqrt{2\pi}(n-3)(\frac{u}{k_n} + \sqrt{1 - e^{-2\beta}})} \left( 1 - \left( \frac{u}{k_n} + \sqrt{1 - e^{-2\beta}} \right)^2 \right)^{\frac{n-1}{2}} \right) \\
&\triangleq \exp(-M).
\end{aligned}$$

Taking the logarithm of the exponent  $M$ , we get

$$\begin{aligned}
\log M &= \log p + \frac{n-1}{2} \log \left( 1 - \left( \frac{u}{k_n} + \sqrt{1 - e^{-2\beta}} \right)^2 \right) + \log \frac{\sqrt{n}}{\sqrt{2\pi}(n-3)(\frac{u}{k_n} + \sqrt{1 - e^{-2\beta}})} \\
&\sim n\beta + \frac{n-1}{2} \log \left( e^{-2\beta} - \frac{u^2}{k_n^2} - \frac{2u}{k_n} \sqrt{1 - e^{-2\beta}} \right) - \frac{1}{2} \log n - \frac{1}{2} \log(1 - e^{-2\beta}) - \frac{1}{2} \log(2\pi)
\end{aligned}$$

$$\begin{aligned}
&\sim n\beta - (n-1)\beta - \frac{n-1}{2} \frac{u^2}{k_n^2} - (n-1) \frac{u}{k_n} \sqrt{1-e^{-2\beta}} - \frac{1}{2} \log n - \frac{1}{2} \log(1-e^{-2\beta}) - \frac{1}{2} \log(2\pi) \\
&\sim \beta - \left( u \sqrt{1-e^{-2\beta}} + \frac{1}{2} \right) \log n - \frac{1}{2} \log(1-e^{-2\beta}) - \frac{1}{2} \log(2\pi).
\end{aligned}$$

If  $u > 0$ , then as  $n \rightarrow \infty$ ,  $M \rightarrow 0$ , and thus  $\mathbb{P}\left(k_n \left(L_n - \sqrt{1-e^{-2\beta}}\right) \leq u\right) \rightarrow 0$ . If  $u < -\frac{1}{2\sqrt{1-e^{-2\beta}}}$ , then as  $n \rightarrow \infty$ ,  $M \rightarrow \infty$ , and hence  $\mathbb{P}\left(k_n \left(L_n - \sqrt{1-e^{-2\beta}}\right) \leq u\right) \rightarrow 1$ . We can then conclude that  $|L_n - \sqrt{1-e^{-2\beta}}| = O_P\left(\frac{\log n}{n}\right)$ .  $\square$

**Lemma 6.** *Let  $U$  have a uniform distribution on the unit sphere  $\mathbb{S}^{n-1}$  and let  $x \in \mathbb{R}^n$  be a fixed vector. Then*

$$\mathbb{P}(|\langle U, x \rangle| > \epsilon) \leq K \sqrt{n} (1 - \epsilon^2)^{\frac{n-2}{2}}.$$

for all  $n \geq 2$  and  $\epsilon \in (0, 1)$ , where  $K$  is a universal constant. Therefore,

$$\langle U, x \rangle = O_P\left(\sqrt{\frac{\log n}{n}}\right).$$

*Proof.* This is a direct result from Proposition 1 in [1].  $\square$
